# Supplementary material for: Conformational study of 2-phenylethylamine by molecular-beam Fourier transform microwave spectroscopy
Source: Royal Society of Chemistry journal article supplement (doi:10.1039/b705614a), 2007-01-01
Supplement: b705614a.pdf [file b705614a.pdf]

# Conformational Study of 2-Phenylethylamine by Molecular-Beam Fourier Transform Microwave Spectroscopy

Juan C. López<sup>a</sup>, Vanessa Cortijo<sup>a</sup>, Susana Blanco<sup>a</sup> and Jose L. Alonso,<sup>\*a</sup>

<sup>a</sup> Grupo de Espectroscopía Molecular (GEM), Departamento de Química Física y Química Inorgánica, Facultad de Ciencias, Universidad de Valladolid, E-47005 Valladolid, SPAIN. Fax: +34-983423204; Tel: +34-983423204; E-mail: jclopez@qf.uva.es; vcortijoi@qf.uva.es; sblanco@qf.uva.es; jlonso@qf.uva.es

## Supplementary information

Tables of observed rotational frequencies for the four conformers of 2-phenylethylamine observed in this work.

4 Tables  
7 Pages

Table S1. Measured rotational transitions (in MHz) of conformer GI of Phenylethylamine.

| $J'$ | $K'_{-1}$ | $K'_{+1}$ | $J''$ | $K''_{-1}$ | $K''_{+1}$ | $F'$ | $F''$ | $\nu_{\text{obs}}$ | $\nu_{\text{obs}} - \nu_{\text{cal}}$ |
|------|-----------|-----------|-------|------------|------------|------|-------|--------------------|---------------------------------------|
| 2    | 1         | 2         | 1     | 0          | 1          | 1    | 0     | 6191.7825          | -0.0021                               |
|      |           |           |       |            |            | 2    | 1     | 6191.2362          | 0.0037                                |
|      |           |           |       |            |            | 3    | 2     | 6191.3415          | -0.0012                               |
|      |           |           |       |            |            | 1    | 1     | 6190.7785          | 0.0012                                |
|      |           |           |       |            |            | 2    | 2     | 6191.6372          | 0.0018                                |
|      |           |           |       |            |            | 2    | 2     | 6191.6372          | 0.0018                                |
| 2    | 2         | 0         | 1     | 1          | 1          | 1    | 0     | 11025.3162         | 0.0019                                |
|      |           |           |       |            |            | 2    | 1     | 11024.9633         | 0.0013                                |
|      |           |           |       |            |            | 3    | 2     | 11025.2649         | -0.0024                               |
|      |           |           |       |            |            | 1    | 1     | 11025.6404         | 0.0014                                |
|      |           |           |       |            |            | 2    | 2     | 11024.8329         | 0.0009                                |
|      |           |           |       |            |            | 2    | 2     | 11024.8329         | 0.0009                                |
| 2    | 2         | 1         | 1     | 1          | 0          | 1    | 0     | 10900.2861         | -0.0005                               |
|      |           |           |       |            |            | 2    | 1     | 10900.2861         | -0.0005                               |
|      |           |           |       |            |            | 3    | 2     | 10900.4479         | -0.0028                               |
|      |           |           |       |            |            | 1    | 1     | 10900.9671         | 0.0034                                |
|      |           |           |       |            |            | 2    | 2     | 10900.0188         | -0.0002                               |
|      |           |           |       |            |            | 2    | 2     | 10900.0188         | -0.0002                               |
| 2    | 1         | 1         | 1     | 0          | 1          | 1    | 0     | 6552.1460          | -0.0010                               |
|      |           |           |       |            |            | 2    | 1     | 6551.3596          | 0.0036                                |
|      |           |           |       |            |            | 3    | 2     | 6551.6203          | 0.0005                                |
|      |           |           |       |            |            | 1    | 1     | 6551.1415          | 0.0018                                |
|      |           |           |       |            |            | 2    | 2     | 6551.1415          | 0.0018                                |
|      |           |           |       |            |            | 2    | 2     | 6551.1415          | 0.0018                                |
| 2    | 2         | 0         | 1     | 1          | 0          | 1    | 0     | 10904.9970         | -0.0004                               |
|      |           |           |       |            |            | 2    | 1     | 10904.9970         | -0.0004                               |
|      |           |           |       |            |            | 3    | 2     | 10905.1618         | -0.0007                               |
|      |           |           |       |            |            | 2    | 2     | 10904.7304         | 0.0033                                |
|      |           |           |       |            |            | 2    | 2     | 10904.7304         | 0.0033                                |
|      |           |           |       |            |            | 2    | 2     | 10904.7304         | 0.0033                                |
| 2    | 2         | 1         | 1     | 1          | 1          | 2    | 1     | 11020.2534         | -0.0004                               |
|      |           |           |       |            |            | 3    | 2     | 11020.5527         | -0.0030                               |
|      |           |           |       |            |            | 1    | 1     | 11020.9271         | 0.0017                                |
|      |           |           |       |            |            | 2    | 2     | 11020.1220         | -0.0019                               |
|      |           |           |       |            |            | 2    | 2     | 11020.1220         | -0.0019                               |
|      |           |           |       |            |            | 2    | 2     | 11020.1220         | -0.0019                               |
| 3    | 1         | 3         | 2     | 0          | 2          | 2    | 1     | 8051.6010          | 0.0028                                |
|      |           |           |       |            |            | 3    | 2     | 8051.4836          | 0.0001                                |
|      |           |           |       |            |            | 4    | 3     | 8051.5043          | 0.0021                                |
|      |           |           |       |            |            | 2    | 2     | 8050.9235          | 0.0023                                |
|      |           |           |       |            |            | 3    | 3     | 8051.9211          | 0.0024                                |
|      |           |           |       |            |            | 3    | 3     | 8051.9211          | 0.0024                                |
| 3    | 1         | 2         | 2     | 0          | 2          | 2    | 1     | 8772.0634          | -0.0006                               |
|      |           |           |       |            |            | 3    | 2     | 8771.7328          | -0.0015                               |
|      |           |           |       |            |            | 4    | 3     | 8771.9113          | -0.0010                               |
|      |           |           |       |            |            | 2    | 2     | 8771.3867          | -0.0003                               |
|      |           |           |       |            |            | 3    | 3     | 8772.1676          | -0.0020                               |
|      |           |           |       |            |            | 3    | 3     | 8772.1676          | -0.0020                               |
| 3    | 2         | 1         | 2     | 1          | 1          | 2    | 1     | 12842.3957         | -0.0013                               |
|      |           |           |       |            |            | 3    | 2     | 12842.1668         | -0.0015                               |
|      |           |           |       |            |            | 4    | 3     | 12842.3146         | -0.0020                               |
|      |           |           |       |            |            | 4    | 3     | 12842.3146         | -0.0020                               |
| 3    | 2         | 2         | 2     | 1          | 2          | 2    | 1     | 13179.2493         | 0.0017                                |
|      |           |           |       |            |            | 3    | 2     | 13178.7932         | 0.0008                                |
|      |           |           |       |            |            | 4    | 3     | 13179.0837         | -0.0014                               |
|      |           |           |       |            |            | 4    | 3     | 13179.0837         | -0.0014                               |
| 4    | 1         | 3         | 3     | 0          | 3          | 3    | 2     | 11059.6230         | 0.0007                                |
|      |           |           |       |            |            | 4    | 3     | 11059.3952         | -0.0012                               |
|      |           |           |       |            |            | 5    | 4     | 11059.5423         | -0.0001                               |
|      |           |           |       |            |            | 3    | 3     | 11059.0039         | -0.0017                               |
|      |           |           |       |            |            | 4    | 4     | 11059.8499         | -0.0034                               |
|      |           |           |       |            |            | 4    | 4     | 11059.8499         | -0.0034                               |
| 4    | 2         | 3         | 3     | 1          | 3          | 3    | 2     | 15396.9595         | 0.0035                                |
|      |           |           |       |            |            | 4    | 3     | 15396.6259         | 0.0009                                |
|      |           |           |       |            |            | 5    | 4     | 15396.8577         | 0.0002                                |
|      |           |           |       |            |            | 3    | 3     | 15396.3958         | 0.0020                                |
|      |           |           |       |            |            | 3    | 3     | 15396.3958         | 0.0020                                |

Table S1. (continued)

| $J'$ | $K'_{-1}$ | $K'_{+1}$ | $J''$ | $K''_{-1}$ | $K''_{+1}$ | $F'$ | $F''$ | $V_{\text{obs}}$ | $V_{\text{obs}} - V_{\text{cal}}$ |
|------|-----------|-----------|-------|------------|------------|------|-------|------------------|-----------------------------------|
| 4    | 2         | 2         | 3     | 1          | 2          | 4    | 3     | 14746.5377       | -0.0056                           |
| 4    |           |           |       |            |            | 3    | 2     | 14746.6778       | -0.0027                           |
| 4    |           |           |       |            |            | 5    | 4     | 14746.6359       | 0.0025                            |
| 4    |           |           |       |            |            | 3    | 3     | 14746.3289       | -0.0042                           |
| 5    | 0         | 5         | 4     | 1          | 4          | 4    | 3     | 8347.9652        | 0.0038                            |
| 5    |           |           |       |            |            | 5    | 4     | 8347.9652        | 0.0038                            |
| 5    |           |           |       |            |            | 6    | 5     | 8347.9387        | -0.0030                           |
| 5    | 1         | 4         | 4     | 0          | 4          | 4    | 3     | 13423.0521       | -0.0012                           |
| 5    |           |           |       |            |            | 5    | 4     | 13422.8676       | -0.0000                           |
| 5    |           |           |       |            |            | 6    | 5     | 13423.0011       | 0.0004                            |
| 5    |           |           |       |            |            | 4    | 4     | 13422.4541       | -0.0024                           |
| 5    |           |           |       |            |            | 5    | 5     | 13423.3417       | -0.0006                           |
| 5    | 2         | 4         | 4     | 1          | 4          | 4    | 3     | 17674.1090       | 0.0024                            |
| 5    |           |           |       |            |            | 5    | 4     | 17673.8522       | 0.0021                            |
| 5    |           |           |       |            |            | 6    | 5     | 17674.0444       | 0.0022                            |
| 5    | 2         | 3         | 4     | 1          | 3          | 4    | 3     | 16636.2949       | -0.0002                           |
| 5    |           |           |       |            |            | 5    | 4     | 16636.2079       | -0.0035                           |
| 5    |           |           |       |            |            | 6    | 5     | 16636.2684       | 0.0012                            |
| 5    |           |           |       |            |            | 4    | 4     | 16635.9044       | 0.0001                            |
| 6    | 1         | 5         | 5     | 0          | 5          | 5    | 4     | 15872.7873       | -0.0017                           |
| 6    |           |           |       |            |            | 6    | 5     | 15872.6210       | -0.0001                           |
| 6    |           |           |       |            |            | 7    | 6     | 15872.7534       | 0.0034                            |

Table S2. Measured rotational transitions (in MHz) of conformer GII of Phenylethylamine.

| $J'$ | $K'_{-1}$ | $K'_{+1}$ | $J''$ | $K''_{-1}$ | $K''_{+1}$ | $F'$ | $F''$ | $\nu_{\text{obs}}$ | $\nu_{\text{obs}} - \nu_{\text{cal}}$ |
|------|-----------|-----------|-------|------------|------------|------|-------|--------------------|---------------------------------------|
| 2    | 1         | 1         | 1     | 0          | 1          | 1    | 0     | 6486.8756          | -0.00117                              |
|      |           |           |       |            |            | 2    | 1     | 6486.4018          | -0.00052                              |
|      |           |           |       |            |            | 3    | 2     | 6486.8898          | -0.00050                              |
|      |           |           |       |            |            | 1    | 1     | 6487.6299          | -0.00040                              |
|      |           |           |       |            |            | 2    | 2     | 6486.1017          | 0.00082                               |
| 2    | 2         | 0         | 1     | 1          | 0          | 1    | 0     | 10823.6745         | -0.00224                              |
|      |           |           |       |            |            | 2    | 1     | 10825.2172         | -0.00335                              |
|      |           |           |       |            |            | 3    | 2     | 10824.4924         | 0.00004                               |
|      |           |           |       |            |            | 2    | 2     | 10824.7887         | 0.00365                               |
| 2    | 2         | 1         | 1     | 1          | 1          | 1    | 0     | 10930.4355         | -0.00058                              |
|      |           |           |       |            |            | 2    | 1     | 10929.0978         | 0.00136                               |
|      |           |           |       |            |            | 3    | 2     | 10929.5114         | 0.00108                               |
|      |           |           |       |            |            | 1    | 1     | 10928.5948         | 0.00059                               |
|      |           |           |       |            |            | 2    | 2     | 10929.8320         | -0.00126                              |
| 2    | 2         | 1         | 2     | 1          | 1          | 1    | 1     | 6663.1801          | -0.00222                              |
|      |           |           |       |            |            | 2    | 2     | 6664.9130          | 0.00038                               |
|      |           |           |       |            |            | 3    | 3     | 6663.7991          | -0.00113                              |
| 3    | 1         | 2         | 2     | 0          | 2          | 2    | 1     | 8675.5368          | -0.00152                              |
|      |           |           |       |            |            | 3    | 2     | 8674.7849          | -0.00411                              |
|      |           |           |       |            |            | 4    | 3     | 8675.3854          | -0.00324                              |
|      |           |           |       |            |            | 2    | 2     | 8675.9932          | -0.00042                              |
|      |           |           |       |            |            | 3    | 3     | 8674.4979          | 0.00152                               |
| 3    | 2         | 1         | 2     | 1          | 1          | 2    | 1     | 12754.8335         | 0.00005                               |
|      |           |           |       |            |            | 3    | 2     | 12755.9567         | 0.00074                               |
|      |           |           |       |            |            | 4    | 3     | 12755.2495         | 0.00487                               |
|      |           |           |       |            |            | 2    | 2     | 12756.0662         | 0.00470                               |
|      |           |           |       |            |            | 3    | 3     | 12755.1632         | -0.00326                              |
|      |           |           |       |            |            | 2    | 2     | 13062.4966         | 0.00049                               |
| 3    | 2         | 2         | 2     | 1          | 2          | 3    | 2     | 13061.7725         | 0.00170                               |
|      |           |           |       |            |            | 4    | 3     | 13062.2379         | 0.00074                               |
|      |           |           |       |            |            | 2    | 2     | 6502.8860          | -0.00132                              |
|      |           |           |       |            |            | 3    | 3     | 6504.0920          | -0.00005                              |
| 4    | 1         | 4         | 3     | 1          | 3          | 4    | 4     | 6503.2054          | 0.00574                               |
|      |           |           |       |            |            | 3    | 2     | 7870.9470          | 0.00221                               |
|      |           |           |       |            |            | 4    | 3     | 7870.8925          | -0.00100                              |
|      |           |           |       |            |            | 5    | 4     | 7870.9037          | -0.00032                              |
|      |           |           |       |            |            | 3    | 3     | 7870.3936          | 0.00171                               |
| 4    | 0         | 4         | 3     | 0          | 3          | 4    | 4     | 7871.3029          | -0.00024                              |
|      |           |           |       |            |            | 3    | 2     | 8057.2041          | 0.00067                               |
|      |           |           |       |            |            | 4    | 3     | 8057.2964          | -0.00252                              |
|      |           |           |       |            |            | 5    | 4     | 8057.2432          | 0.00116                               |
|      |           |           |       |            |            | 3    | 3     | 8057.5495          | -0.00053                              |
|      |           |           |       |            |            | 4    | 4     | 8057.0393          | -0.00283                              |
| 4    | 1         | 3         | 3     | 1          | 2          | 3    | 2     | 8305.2340          | 0.00316                               |
|      |           |           |       |            |            | 4    | 3     | 8305.2658          | 0.00034                               |
|      |           |           |       |            |            | 5    | 4     | 8305.3043          | 0.00045                               |
| 4    | 1         | 3         | 3     | 0          | 3          | 3    | 2     | 10924.4440         | -0.00150                              |
|      |           |           |       |            |            | 4    | 3     | 10923.6224         | 0.00028                               |
|      |           |           |       |            |            | 5    | 4     | 10924.2944         | -0.00162                              |
|      |           |           |       |            |            | 3    | 3     | 10924.7908         | -0.00127                              |
|      |           |           |       |            |            | 4    | 4     | 10923.3671         | 0.00175                               |
| 4    | 3         | 2         | 4     | 2          | 2          | 3    | 3     | 11333.1645         | -0.00035                              |
|      |           |           |       |            |            | 4    | 4     | 11333.6249         | -0.00253                              |
|      |           |           |       |            |            | 5    | 5     | 11333.2576         | -0.00188                              |

Table S2. (Continued)

| $J'$ | $K'_{-1}$ | $K'_{+1}$ | $J''$ | $K''_{-1}$ | $K''_{+1}$ | $F'$ | $F''$ | $V_{\text{obs}}$ | $V_{\text{obs}} - V_{\text{cal}}$ |
|------|-----------|-----------|-------|------------|------------|------|-------|------------------|-----------------------------------|
| 5    | 1         | 5         | 4     | 1          | 4          | 4    | 3     | 9831.8817        | 0.00078                           |
|      |           |           |       |            |            | 5    | 4     | 9831.8664        | -0.00150                          |
|      |           |           |       |            |            | 6    | 5     | 9831.8612        | 0.00021                           |
| 5    | 0         | 5         | 4     | 0          | 4          | 4    | 4     | 9831.3760        | -0.00328                          |
|      |           |           |       |            |            | 4    | 3     | 10043.3729       | 0.00006                           |
|      |           |           |       |            |            | 5    | 4     | 10043.4718       | -0.00073                          |
| 5    | 1         | 4         | 4     | 1          | 3          | 6    | 5     | 10043.3979       | -0.00037                          |
|      |           |           |       |            |            | 5    | 5     | 10043.2738       | 0.00118                           |
|      |           |           |       |            |            | 4    | 3     | 10373.6222       | -0.00021                          |
| 5    | 1         | 4         | 4     | 0          | 4          | 5    | 4     | 10373.6574       | -0.00294                          |
|      |           |           |       |            |            | 6    | 5     | 10373.6733       | 0.00313                           |
|      |           |           |       |            |            | 5    | 5     | 10372.7293       | -0.00042                          |
| 5    | 1         | 4         | 4     | 0          | 4          | 4    | 3     | 13240.8663       | 0.00178                           |
|      |           |           |       |            |            | 5    | 4     | 13239.9847       | 0.00118                           |
|      |           |           |       |            |            | 6    | 5     | 13240.7250       | 0.00085                           |

Table S3. Measured rotational transitions (in MHz) of conformer AI of Phenylethylamine.

| $J'$ | $K'_{-1}$ | $K'_{+1}$ | $J''$ | $K''_{-1}$ | $K''_{+1}$ | $F'$ | $F''$ | $\nu_{\text{obs}}$ | $\nu_{\text{obs}} - \nu_{\text{cal}}$ |
|------|-----------|-----------|-------|------------|------------|------|-------|--------------------|---------------------------------------|
| 1    | 1         | 0         | 0     | 0          | 0          | 0    | 1     | 5253.8622          | -0.0032                               |
|      |           |           |       |            |            | 2    | 1     | 5253.5976          | -0.0005                               |
|      |           |           |       |            |            | 1    | 1     | 5253.4225          | 0.0029                                |
| 2    | 1         | 1         | 1     | 0          | 1          | 1    | 0     | 6969.1469          | 0.0024                                |
|      |           |           |       |            |            | 2    | 1     | 6968.2218          | -0.0009                               |
|      |           |           |       |            |            | 3    | 2     | 6968.3609          | 0.0008                                |
| 3    | 1         | 2         | 2     | 0          | 2          | 2    | 1     | 8729.1759          | -0.0012                               |
|      |           |           |       |            |            | 3    | 2     | 8729.0712          | -0.0010                               |
|      |           |           |       |            |            | 4    | 3     | 8729.0291          | 0.0006                                |
| 4    | 1         | 3         | 3     | 0          | 3          | 4    | 3     | 10537.8025         | -0.0022                               |
|      |           |           |       |            |            | 5    | 4     | 10537.6819         | 0.0013                                |
| 5    | 1         | 4         | 4     | 0          | 4          | 4    | 3     | 12397.6048         | 0.0033                                |
|      |           |           |       |            |            | 5    | 4     | 12397.7647         | 0.0014                                |
|      |           |           |       |            |            | 6    | 5     | 12397.5890         | -0.0033                               |
| 6    | 1         | 5         | 5     | 0          | 5          | 5    | 4     | 14313.1292         | 0.00353                               |
|      |           |           |       |            |            | 6    | 5     | 14313.3340         | -0.0017                               |
|      |           |           |       |            |            | 7    | 6     | 14313.1292         | -0.0023                               |

Table S4. Measured rotational transitions (in MHz) of conformer AII of Phenylethylamine.

| $J'$ | $K'_{-1}$ | $K'_{+1}$ | $J''$ | $K''_{-1}$ | $K''_{+1}$ | $F'$ | $F''$ | $\nu_{\text{obs}}$ | $\nu_{\text{obs}} - \nu_{\text{cal}}$ |
|------|-----------|-----------|-------|------------|------------|------|-------|--------------------|---------------------------------------|
| 1    | 1         | 0         | 0     | 0          | 0          | 2    | 1     | 5216.5712          | 0.0008                                |
|      |           |           |       |            |            | 1    | 1     | 5215.6850          | 0.0030                                |
|      |           |           |       |            |            | 0    | 1     | 5217.8990          | -0.0042                               |
| 2    | 1         | 1         | 1     | 0          | 1          | 1    | 0     | 6928.9583          | -0.0020                               |
|      |           |           |       |            |            | 2    | 1     | 6927.1716          | 0.0022                                |
|      |           |           |       |            |            | 3    | 2     | 6928.0929          | -0.0018                               |
|      |           |           |       |            |            | 1    | 1     | 6928.0269          | -0.0038                               |
| 2    | 2         | 0         | 1     | 1          | 0          | 1    | 0     | 13847.8948         | -0.0034                               |
|      |           |           |       |            |            | 2    | 1     | 13849.4663         | -0.0034                               |
|      |           |           |       |            |            | 3    | 2     | 13848.9988         | -0.0000                               |
| 2    | 2         | 1         | 1     | 1          | 1          | 1    | 0     | 13938.9180         | 0.0055                                |
|      |           |           |       |            |            | 2    | 1     | 13937.0003         | -0.0012                               |
|      |           |           |       |            |            | 3    | 2     | 13937.9132         | -0.0031                               |
|      |           |           |       |            |            | 2    | 2     | 10514.8801         | 0.0012                                |
|      |           |           |       |            |            | 3    | 3     | 10514.7294         | 0.0053                                |
| 3    | 1         | 2         | 2     | 0          | 2          | 2    | 1     | 8685.8421          | 0.0034                                |
|      |           |           |       |            |            | 3    | 2     | 8684.5648          | 0.0026                                |
|      |           |           |       |            |            | 4    | 3     | 8685.4406          | -0.0034                               |
| 4    | 1         | 4         | 3     | 1          | 3          | 3    | 2     | 6300.1242          | 0.0027                                |
|      |           |           |       |            |            | 5    | 4     | 6300.0402          | 0.0009                                |
|      |           |           |       |            |            | 4    | 3     | 6300.1150          | -0.0009                               |
| 4    | 0         | 4         | 3     | 0          | 3          | 3    | 2     | 6467.0914          | -0.0005                               |
|      |           |           |       |            |            | 4    | 3     | 6467.1120          | -0.0007                               |
|      |           |           |       |            |            | 5    | 4     | 6467.0622          | 0.0002                                |
|      |           |           |       |            |            | 3    | 2     | 6661.5541          | -0.0000                               |
| 4    | 1         | 3         | 3     | 1          | 2          | 4    | 3     | 6661.6509          | 0.0013                                |
|      |           |           |       |            |            | 5    | 4     | 6661.6109          | 0.0029                                |
|      |           |           |       |            |            | 3    | 2     | 10491.0144         | 0.0051                                |
|      |           |           |       |            |            | 4    | 3     | 10489.8519         | -0.0013                               |
| 4    | 1         | 3         | 3     | 0          | 3          | 5    | 4     | 10490.7382         | -0.0003                               |
|      |           |           |       |            |            | 4    | 3     | 7872.0101          | -0.0020                               |
|      |           |           |       |            |            | 5    | 4     | 7872.0101          | -0.0020                               |
|      |           |           |       |            |            | 6    | 5     | 7871.9594          | -0.0009                               |
| 5    | 0         | 5         | 4     | 0          | 4          | 4    | 3     | 8071.0299          | 0.0009                                |
|      |           |           |       |            |            | 5    | 4     | 8071.0715          | -0.0003                               |
|      |           |           |       |            |            | 6    | 5     | 8071.0141          | 0.0007                                |
| 5    | 1         | 4         | 4     | 0          | 4          | 4    | 3     | 12347.5116         | -0.0006                               |
|      |           |           |       |            |            | 5    | 4     | 12346.3905         | -0.0014                               |
|      |           |           |       |            |            | 6    | 5     | 12347.2989         | -0.0008                               |
| 6    | 1         | 6         | 5     | 1          | 5          | 5    | 4     | 9441.9516          | 0.0006                                |
|      |           |           |       |            |            | 6    | 5     | 9441.9516          | 0.0006                                |
|      |           |           |       |            |            | 7    | 6     | 9441.9122          | -0.0008                               |
| 6    | 0         | 6         | 5     | 0          | 5          | 5    | 4     | 9666.6764          | 0.0002                                |
|      |           |           |       |            |            | 6    | 5     | 9666.7346          | 0.0003                                |
|      |           |           |       |            |            | 7    | 6     | 9666.6674          | -0.0003                               |
